# Supplementary material for: A cross-cultural examination of ethical issues in AI development
Source: PeerJ journal article supplement (doi:10.7717/peerj-cs.3504), 2026-01-30
Supplement: Dataset.xlsx [file Dataset.xlsx]

## Sheet: Form Yanıtları 1
Zaman damgası	Gender	Age Range	Industry Sector:	Job Title/Role:	AI serves the interests of humanity and human welfare.	AI degrade the integrity of the human emotional experience.	Those responsible for AI's actions are always reachable.	Artificial intelligence balances accessibility and transparency with privacy and security, especially when it comes to data and personalization.	If AI is deemed untrustworthy by the public, or acts in ways that threaten the safety of either itself or others, preventive measures are always implemented.	AI is inclusive, unbiased, and free from discrimination, in line with social morals and ethics.	AI negatively impacts economic opportunities and employment.	The data collected by AI is used, processed, and managed in a fair, equitable, and legal manner.	AI remains under complete human control, even as it develops and 'learns'. That is why AI can be used ethically.	We can protected against the potential environmental harm associated with the development and use of AI.	The public is aware, educated, and informed about their use of and interaction with AI.	AI pre-emptively mitigates and regulates potential harm. Advanced machine learning is both progressive and manageable.	Your Country
2024-04-19 23:21:26	Female	45-54	Technology/IT	Researcher/Academician	Strongly Agree	Agree	Neutral	Agree	Disagree	Disagree	Disagree	Agree	Neutral	Agree	Disagree	Neutral	Turkiye
2024-04-24 12:36:39	Female	45-54	Education	Researcher/Academician	Strongly Agree	Neutral	Agree	Disagree	Agree	Disagree	Disagree	Disagree	Agree	Agree	Disagree	Neutral	Italy
2024-04-24 12:55:34	Male	35-44	Education	Researcher/Academician	Agree	Disagree	Disagree	Neutral	Disagree	Disagree	Disagree	Neutral	Disagree	Neutral	Disagree	Disagree	AT
2024-04-24 13:07:19	Male	55-64		Executive/Manager	Agree	Agree	Strongly Agree	Disagree	Neutral	Neutral	Disagree	Disagree	Neutral	Neutral	Disagree	Neutral	spain
2024-04-25 10:05:07	Female	45-54	Technology/IT	Executive/Manager	Neutral	Neutral	Neutral	Agree	Agree	Disagree	Neutral	Disagree	Agree	Disagree	Strongly Disagree	Neutral	Turkey
2024-04-25 10:24:00	Female	45-54	Technology/IT	Software Developer/Engineer, Executive/Manager	Agree	Disagree	Neutral	Disagree	Strongly Agree	Neutral	Agree	Disagree	Agree	Strongly Agree	Disagree	Neutral	Türkiye
2024-04-25 10:42:27	Male	35-44	Technology/IT	Data Scientist/Analyst, Software Developer/Engineer, AI Ethics Specialist	Strongly Agree	Agree	Strongly Disagree	Strongly Disagree	Disagree	Disagree	Agree	Strongly Disagree	Strongly Disagree	Disagree	Strongly Disagree	Disagree	Türkiye
2024-04-25 14:02:47	Female	55-64	Technology/IT	Executive/Manager	Agree	Agree	Strongly Disagree	Strongly Disagree	Strongly Disagree	Strongly Disagree	Neutral	Strongly Disagree	Strongly Disagree	Strongly Disagree	Strongly Disagree	Strongly Disagree	uk
2024-04-25 14:31:35	Male	65 or Above	Technology/IT	Researcher/Academician, Executive/Manager	Strongly Disagree	Disagree	Disagree	Disagree	Neutral	Strongly Disagree	Agree	Strongly Disagree	Strongly Disagree	Disagree	Disagree	Neutral	Turkey
2024-04-25 17:42:55	Female	35-44	Technology/IT	Executive/Manager	Neutral	Agree	Disagree	Neutral	Disagree	Disagree	Disagree	Disagree	Neutral	Neutral	Strongly Disagree	Neutral	Belgium
2024-04-25 18:41:59	Male	18-24	Technology/IT	Software Developer/Engineer	Agree	Disagree	Neutral	Strongly Disagree	Disagree	Disagree	Strongly Agree	Strongly Disagree	Neutral	Agree	Disagree	Agree	Türkiye
2024-04-25 18:48:27	Female	18-24	Technology/IT	Software Developer/Engineer	Agree	Neutral	Agree	Neutral	Neutral	Neutral	Neutral	Agree	Agree	Strongly Disagree	Neutral	Disagree	Turkey
2024-04-25 19:36:32	Female	18-24	Technology/IT	Software Developer/Engineer	Neutral	Disagree	Strongly Disagree	Disagree	Strongly Disagree	Strongly Agree	Strongly Agree	Strongly Agree	Agree	Disagree	Strongly Disagree	Disagree	Türkiye
2024-04-25 20:48:36	Male	18-24	Technology/IT	Data Scientist/Analyst	Strongly Disagree	Strongly Disagree	Agree	Strongly Agree	Disagree	Neutral	Strongly Agree	Strongly Disagree	Disagree	Neutral	Neutral	Agree	Erzincan
2024-04-27 15:20:01	Male	45-54	Technology/IT	Executive/Manager	Agree	Disagree	Disagree	Disagree	Strongly Disagree	Neutral	Agree	Disagree	Neutral	Neutral	Disagree	Neutral	Turkey
2024-04-27 15:40:53	Male	65 or Above	Healthcare	Researcher/Academician	Neutral	Agree	Disagree	Disagree	Disagree	Neutral	Disagree	Agree	Neutral	Strongly Agree	Strongly Disagree	Agree	Türkiye
2024-04-27 15:45:41	Male	25-34	Healthcare	Researcher/Academician	Agree	Neutral	Disagree	Neutral	Neutral	Disagree	Agree	Disagree	Neutral	Agree	Strongly Disagree	Disagree	Turkey
2024-04-27 16:45:27	Male	55-64		Executive/Manager	Neutral	Neutral	Neutral	Neutral	Neutral	Neutral	Neutral	Neutral	Disagree	Disagree	Strongly Disagree	Agree	Turkey
2024-04-27 17:32:44	Male	45-54	Retail	Executive/Manager	Agree	Agree	Disagree	Neutral	Agree	Disagree	Disagree	Disagree	Disagree	Disagree	Disagree	Neutral	Turkey
2024-04-28 10:47:39	Male	45-54	Finance	Executive/Manager	Neutral	Neutral	Neutral	Agree	Agree	Agree	Neutral	Neutral	Agree	Neutral	Neutral	Neutral	Türkiye
2024-04-28 22:08:10	Male	65 or Above	Technology/IT	Software Developer/Engineer	Agree	Disagree	Disagree	Disagree	Disagree	Disagree	Disagree	Disagree	Disagree	Agree	Neutral	Disagree	Poland
2024-04-29 11:51:24	Female	25-34	Government	Software Developer/Engineer	Neutral	Neutral	Neutral	Neutral	Neutral	Neutral	Neutral	Neutral	Neutral	Neutral	Neutral	Neutral	Somali
2024-04-29 12:27:25	Male	18-24	Technology/IT	Software Developer/Engineer	Agree	Agree	Agree	Disagree	Neutral	Agree	Disagree	Agree	Agree	Neutral	Neutral	Neutral	Turkey
2024-04-29 19:03:56	Female	55-64	Education	Researcher/Academician	Strongly Agree	Neutral	Disagree	Disagree	Agree	Disagree	Agree	Agree	Strongly Agree	Agree	Disagree	Agree	Turkey
2024-04-29 20:40:43	Female	18-24	Finance	Data Scientist/Analyst	Agree	Disagree	Neutral	Neutral	Agree	Neutral	Strongly Agree	Disagree	Disagree	Agree	Disagree	Neutral	Türkiye
2024-04-29 22:37:25	Female	18-24	Technology/IT	Software Developer/Engineer	Agree	Neutral	Agree	Agree	Neutral	Disagree	Disagree	Neutral	Agree	Neutral	Disagree	Agree	Turkey
2024-04-29 23:25:55	Female	25-34	Technology/IT	Software Developer/Engineer	Disagree	Agree	Disagree	Disagree	Neutral	Strongly Disagree	Neutral	Strongly Disagree	Strongly Disagree	Strongly Disagree	Strongly Disagree	Disagree	Finland
2024-04-30 10:57:39	Male	18-24	Technology/IT	Software Developer/Engineer	Agree	Neutral	Neutral	Neutral	Neutral	Neutral	Disagree	Neutral	Agree	Neutral	Agree	Neutral	Turkey
2024-04-30 18:11:24	Male	55-64	Technology/IT	Data Scientist/Analyst	Neutral	Neutral	Disagree	Neutral	Strongly Disagree	Neutral	Disagree	Disagree	Disagree	Disagree	Disagree	Neutral	Netherlands
2024-04-30 22:13:09	Male	18-24	Technology/IT	Software Developer/Engineer	Agree	Strongly Agree	Strongly Agree	Neutral	Agree	Strongly Disagree	Neutral	Neutral	Disagree	Disagree	Disagree	Neutral	Yemen
2024-05-01 17:14:11	Male	45-54	Finance	Executive/Manager	Disagree	Neutral	Disagree	Neutral	Disagree	Disagree	Strongly Agree	Strongly Agree	Agree	Agree	Strongly Agree	Strongly Agree	Turkey
2024-05-01 17:27:06	Female	45-54	Education	Executive/Manager	Agree	Agree	Agree	Agree	Disagree	Agree	Neutral	Neutral	Agree	Neutral	Agree	Agree	Turkey
2024-05-01 17:55:24	Male	45-54	Retail	Executive/Manager	Neutral	Disagree	Disagree	Agree	Neutral	Agree	Agree	Neutral	Disagree	Disagree	Strongly Disagree	Disagree	TR
2024-05-01 19:07:48	Female	45-54	Retail	Executive/Manager	Agree	Neutral	Neutral	Neutral	Agree	Neutral	Disagree	Agree	Neutral	Neutral	Disagree	Neutral	Turkey
2024-05-01 19:26:12	Female	45-54	Education	AI Ethics Specialist, Researcher/Academician	Disagree	Neutral	Disagree	Agree	Disagree	Strongly Disagree	Agree	Disagree	Disagree	Neutral	Disagree	Neutral	TR
2024-05-01 20:40:52	Female	45-54	Education	Executive/Manager	Agree	Neutral	Agree	Agree	Agree	Agree	Neutral	Neutral	Neutral	Neutral	Neutral	Neutral	Turkiye
2024-05-01 22:02:13	Male	45-54	Technology/IT	Executive/Manager	Agree	Agree	Neutral	Agree	Agree	Disagree	Disagree	Neutral	Disagree	Agree	Agree	Agree	Türkiye
2024-05-02 10:19:22	Female	45-54	Education	Data Scientist/Analyst	Agree	Neutral	Agree	Agree	Agree	Agree	Agree	Neutral	Neutral	Neutral	Neutral	Disagree	Turkiye
2024-05-03 11:42:05	Female	25-34	Education	Researcher/Academician	Strongly Agree	Disagree	Disagree	Neutral	Disagree	Disagree	Strongly Disagree	Neutral	Agree	Agree	Agree	Neutral	Austria
2024-05-03 11:43:14	Male	35-44	Education	Researcher/Academician	Neutral	Agree	Strongly Agree	Neutral	Neutral	Strongly Disagree	Disagree	Neutral	Strongly Agree	Strongly Agree	Disagree	Neutral	Tanzania
2024-05-03 12:05:42	Male	25-34	Automotive	Researcher/Academician	Agree	Neutral	Agree	Agree	Agree	Agree	Neutral	Agree	Agree	Agree	Agree	Agree	Austria
2024-05-03 17:03:39	Female	35-44	Education	Researcher/Academician	Agree	Disagree	Disagree	Disagree	Strongly Disagree	Neutral	Agree	Neutral	Neutral	Neutral	Disagree	Agree	Mexico
2024-05-04 18:20:36	Male	25-34	Technology/IT	Software Developer/Engineer	Agree	Neutral	Neutral	Neutral	Neutral	Neutral	Neutral	Neutral	Neutral	Disagree	Strongly Disagree	Neutral	Austria
2024-05-07 11:09:57	Female	25-34	Technology/IT	Software Developer/Engineer	Strongly Disagree	Strongly Disagree	Strongly Disagree	Strongly Disagree	Strongly Disagree	Strongly Disagree	Strongly Disagree	Strongly Disagree	Strongly Disagree	Strongly Disagree	Strongly Disagree	Strongly Disagree	Iraq
2024-05-07 11:10:03	Male	18-24	Technology/IT	Software Developer/Engineer	Agree	Agree	Agree	Disagree	Agree	Strongly Agree	Strongly Disagree	Strongly Agree	Agree	Neutral	Disagree	Neutral	Turkey
2024-05-07 11:10:17	Male	18-24	Technology/IT	Software Developer/Engineer	Neutral	Neutral	Disagree	Strongly Disagree	Neutral	Disagree	Strongly Disagree	Disagree	Disagree	Agree	Agree	Agree	Türkiye
2024-05-07 11:11:28	Male	18-24	Government	Software Developer/Engineer	Neutral	Neutral	Neutral	Neutral	Neutral	Neutral	Neutral	Neutral	Neutral	Neutral	Neutral	Neutral	Iraq
2024-05-07 11:11:37	Female	18-24	Technology/IT	Software Developer/Engineer	Agree	Neutral	Disagree	Neutral	Agree	Agree	Disagree	Neutral	Neutral	Agree	Disagree	Agree	Türkiye
2024-05-07 11:11:44	Female	18-24	Technology/IT	Software Developer/Engineer	Agree	Neutral	Disagree	Agree	Neutral	Neutral	Neutral	Agree	Agree	Agree	Disagree	Agree	Türkiye
2024-05-07 11:12:01	Female	18-24	Technology/IT	Software Developer/Engineer	Agree	Neutral	Neutral	Agree	Disagree	Neutral	Disagree	Agree	Neutral	Neutral	Disagree	Neutral	Turkey
2024-05-07 11:12:20	Male	18-24	Technology/IT	Software Developer/Engineer	Neutral	Neutral	Neutral	Neutral	Neutral	Agree	Agree	Agree	Neutral	Neutral	Agree	Neutral	Türkiye
2024-05-07 11:12:53	Male	18-24	Technology/IT	Software Developer/Engineer	Neutral	Neutral	Agree	Disagree	Agree	Disagree	Agree	Agree	Agree	Agree	Strongly Disagree	Neutral	Turkiye
2024-05-07 11:12:55	Male	18-24	Technology/IT	Software Developer/Engineer	Neutral	Agree	Disagree	Strongly Disagree	Strongly Disagree	Strongly Disagree	Strongly Agree	Neutral	Disagree	Strongly Disagree	Disagree	Agree	Turkiye
2024-05-07 11:14:17	Male	18-24	Technology/IT	Software Developer/Engineer	Neutral	Agree	Disagree	Agree	Strongly Agree	Strongly Agree	Neutral	Agree	Strongly Disagree	Strongly Disagree	Strongly Disagree	Disagree	Turkey
2024-05-07 11:15:25	Male	18-24	Technology/IT	Software Developer/Engineer	Strongly Agree	Disagree	Disagree	Agree	Agree	Strongly Agree	Agree	Agree	Disagree	Neutral	Neutral	Neutral	Türkiye
2024-05-07 11:15:30	Male	18-24	Technology/IT	Software Developer/Engineer	Agree	Neutral	Agree	Disagree	Agree	Disagree	Strongly Disagree	Neutral	Neutral	Agree	Strongly Disagree	Agree	Türkiye
2024-05-07 11:15:42	Female	18-24	Automotive	Software Developer/Engineer	Neutral	Neutral	Agree	Strongly Disagree	Disagree	Disagree	Disagree	Disagree	Disagree	Neutral	Strongly Disagree	Neutral	türkiye
2024-05-07 11:15:44	Male	18-24	Technology/IT	AI Ethics Specialist, Data Scientist/Analyst	Neutral	Neutral	Neutral	Disagree	Strongly Agree	Disagree	Neutral	Strongly Disagree	Disagree	Neutral	Disagree	Neutral	Türkiye
2024-05-07 11:19:31	Female	18-24	Technology/IT	Software Developer/Engineer	Strongly Agree	Agree	Agree	Agree	Agree	Agree	Agree	Agree	Agree	Neutral	Neutral	Agree	Turkey
2024-05-07 11:20:08	Male	18-24	Education	Software Developer/Engineer	Agree	Agree	Agree	Agree	Agree	Agree	Agree	Agree	Agree	Agree	Agree	Agree	Egypt
2024-05-07 11:35:23	Male	18-24	Education	Software Developer/Engineer	Agree	Disagree	Agree	Disagree	Neutral	Neutral	Neutral	Disagree	Agree	Strongly Agree	Agree	Neutral	Turkey
2024-05-07 11:36:18	Male	18-24	Finance	Software Developer/Engineer	Strongly Agree	Strongly Agree	Strongly Agree	Strongly Agree	Strongly Agree	Strongly Agree	Strongly Agree	Strongly Agree	Strongly Agree	Strongly Agree	Strongly Agree	Strongly Agree	Egypt
2024-05-07 12:56:01	Male	18-24	Technology/IT	Software Developer/Engineer	Neutral	Neutral	Neutral	Neutral	Agree	Agree	Agree	Strongly Agree	Disagree	Disagree	Neutral	Strongly Disagree	Turkey
2024-05-07 13:40:00	Female	55-64	Technology/IT	Executive/Manager	Agree	Neutral	Disagree	Disagree	Disagree	Disagree	Disagree	Disagree	Neutral	Disagree	Disagree	Neutral	Denmark
2024-05-07 15:28:53	Male	35-44	Technology/IT	Executive/Manager	Agree	Neutral	Neutral	Disagree	Disagree	Disagree	Disagree	Disagree	Disagree	Agree	Strongly Disagree	Neutral	Germany
2024-05-07 17:13:16	Male	18-24	Technology/IT	AI Ethics Specialist	Neutral	Neutral	Disagree	Disagree	Strongly Agree	Disagree	Neutral	Disagree	Disagree	Neutral	Strongly Disagree	Neutral	Turkey
2024-05-07 22:46:41	Male	18-24	Technology/IT	Data Scientist/Analyst, Software Developer/Engineer	Agree	Agree	Agree	Agree	Agree	Agree	Neutral	Neutral	Neutral	Neutral	Agree	Neutral	from all over the world
2024-05-08 11:11:11	Female	18-24	Education	Software Developer/Engineer	Strongly Agree	Neutral	Neutral	Agree	Strongly Disagree	Agree	Disagree	Strongly Agree	Disagree	Agree	Agree	Agree	Turkiye
2024-05-08 12:01:06	Male	18-24	Education	Software Developer/Engineer	Agree	Agree	Agree	Strongly Agree	Strongly Agree	Strongly Agree	Neutral	Neutral	Neutral	Neutral	Agree	Agree	Pakistan
2024-05-08 12:14:55	Male	18-24	Technology/IT	Software Developer/Engineer	Neutral	Neutral	Neutral	Neutral	Neutral	Neutral	Neutral	Neutral	Neutral	Neutral	Neutral	Neutral	libya
2024-05-08 14:02:26	Male	18-24	Technology/IT	Software Developer/Engineer	Agree	Neutral	Neutral	Neutral	Neutral	Neutral	Neutral	Neutral	Neutral	Neutral	Neutral	Neutral	Yemen
2024-05-09 18:04:04	Male	18-24	Technology/IT	Software Developer/Engineer	Agree	Disagree	Neutral	Agree	Agree	Agree	Disagree	Disagree	Agree	Agree	Agree	Agree	Morocco
2024-05-10 09:37:31	Male	18-24	Technology/IT	Data Scientist/Analyst	Strongly Agree	Neutral	Agree	Disagree	Disagree	Agree	Disagree	Neutral	Agree	Agree	Disagree	Agree	Algeria
2024-05-10 10:37:51	Male	18-24	Technology/IT	Software Developer/Engineer	Agree	Neutral	Neutral	Agree	Agree	Agree	Agree	Neutral	Disagree	Neutral	Disagree	Agree	Somalia
2024-05-14 07:35:52	Female	45-54	Technology/IT	Executive/Manager	Agree	Neutral	Disagree	Neutral	Neutral	Neutral	Agree	Neutral	Neutral	Agree	Disagree	Disagree	Turkiye
2024-05-14 13:13:40	Female	35-44	Education	Researcher/Academician	Neutral	Neutral	Disagree	Disagree	Neutral	Strongly Disagree	Disagree	Strongly Disagree	Agree	Agree	Strongly Disagree	Neutral	Türkiye
2024-05-15 21:19:08	Male	18-24	Education	Software Developer/Engineer, Data Scientist/Analyst, AI Ethics Specialist	Agree	Neutral	Disagree	Neutral	Disagree	Neutral	Neutral	Neutral	Disagree	Agree	Neutral	Strongly Agree	Morocco
2024-05-16 11:07:59	Male	55-64	Education	Executive/Manager	Agree	Strongly Agree	Disagree	Strongly Disagree	Strongly Disagree	Disagree	Disagree	Disagree	Strongly Disagree	Disagree	Strongly Disagree	Neutral	Austria
2024-05-19 16:39:54	Female	45-54	Education	Researcher/Academician	Neutral	Agree	Neutral	Disagree	Disagree	Disagree	Agree	Neutral	Neutral	Disagree	Disagree	Neutral	Türkiye
2024-05-24 13:26:53	Female	18-24	Technology/IT	Software Developer/Engineer	Agree	Neutral	Disagree	Disagree	Neutral	Neutral	Agree	Disagree	Agree	Agree	Disagree	Neutral	Türkiye
2024-05-26 15:44:56	Female	18-24	Technology/IT	Software Developer/Engineer	Agree	Neutral	Neutral	Agree	Agree	Agree	Disagree	Neutral	Neutral	Agree	Disagree	Agree	Iran
2024-06-02 13:06:41	Male	65 or Above	Technology/IT	Researcher/Academician	Agree	Strongly Disagree	Disagree	Disagree	Neutral	Strongly Disagree	Disagree	Disagree	Disagree	Agree	Disagree	Disagree	sweden
2024-06-20 12:01:44	Male	55-64	Education	Researcher/Academician	Strongly Agree	Disagree	Disagree	Neutral	Agree	Neutral	Disagree	Neutral	Neutral	Agree	Neutral	Neutral	Spain
2024-11-25 22:27:07	Male	55-64	Education	Researcher/Academician	Agree	Agree	Disagree	Disagree	Disagree	Disagree	Strongly Agree	Disagree	Disagree	Disagree	Strongly Disagree	Agree	Belgium
2024-11-25 23:10:40	Male	55-64	Education	Researcher/Academician	Neutral	Agree	Disagree	Disagree	Disagree	Disagree	Neutral	Disagree	Disagree	Disagree	Strongly Disagree	Disagree	Germany
2024-11-26 01:30:16	Male	65 or Above	Technology/IT	Software Developer/Engineer	Neutral	Neutral	Disagree	Strongly Disagree	Strongly Disagree	Strongly Disagree	Neutral	Strongly Disagree	Disagree	Disagree	Strongly Disagree	Strongly Disagree	Italy
2024-11-27 11:42:32	Male	35-44	Technology/IT	Executive/Manager, Researcher/Academician	Agree	Strongly Disagree	Agree	Disagree	Disagree	Strongly Disagree	Strongly Disagree	Disagree	Agree	Neutral	Agree	Agree	Slovenia
2024-11-28 09:56:24	Male	18-24	Technology/IT	Software Developer/Engineer	Neutral	Neutral	Agree	Neutral	Agree	Disagree	Neutral	Neutral	Neutral	Neutral	Neutral	Neutral	Turkey
2024-11-28 09:58:00	Male	18-24	Education	Software Developer/Engineer	Strongly Agree	Agree	Strongly Disagree	Strongly Disagree	Strongly Disagree	Strongly Disagree	Strongly Disagree	Strongly Disagree	Strongly Disagree	Strongly Agree	Strongly Disagree	Strongly Agree	Turkey
2024-11-28 09:58:13	Male	18-24	Technology/IT	Software Developer/Engineer	Agree	Disagree	Strongly Disagree	Disagree	Disagree	Disagree	Disagree	Disagree	Disagree	Agree	Strongly Disagree	Disagree	Türkiye
2024-11-28 10:00:41	Male	18-24	Technology/IT	Data Scientist/Analyst	Agree	Agree	Neutral	Agree	Agree	Disagree	Neutral	Strongly Disagree	Neutral	Disagree	Agree	Disagree	TURKIYE
2024-11-28 10:02:06	Male	18-24	Education	Software Developer/Engineer	Agree	Neutral	Disagree	Neutral	Neutral	Agree	Disagree	Agree	Agree	Agree	Agree	Agree	Egypt
2024-11-28 10:02:08	Female	18-24	Technology/IT	Software Developer/Engineer	Strongly Disagree	Strongly Agree	Strongly Disagree	Strongly Disagree	Strongly Disagree	Strongly Disagree	Neutral	Strongly Disagree	Strongly Disagree	Strongly Disagree	Strongly Disagree	Strongly Disagree	Turkey
2024-11-28 10:03:53	Male	18-24	Technology/IT	Software Developer/Engineer, Data Scientist/Analyst	Strongly Agree	Disagree	Agree	Neutral	Neutral	Strongly Disagree	Neutral	Neutral	Neutral	Disagree	Agree	Agree	Türkiye
2024-11-28 10:04:05	Male	18-24	Government	Software Developer/Engineer, Data Scientist/Analyst	Disagree	Neutral	Disagree	Agree	Disagree	Agree	Neutral	Disagree	Agree	Neutral	Neutral	Disagree	Turkey🇹🇷🇹🇷
2024-11-28 10:04:12	Male	18-24	Education	Software Developer/Engineer	Neutral	Neutral	Neutral	Neutral	Neutral	Neutral	Neutral	Neutral	Neutral	Neutral	Neutral	Neutral	Libya
2024-11-28 10:04:52	Male	18-24	Technology/IT	Software Developer/Engineer	Agree	Strongly Agree	Neutral	Agree	Neutral	Agree	Agree	Neutral	Strongly Agree	Agree	Agree	Neutral	Türkiye
2024-11-28 10:05:37	Male	18-24	Technology/IT	Software Developer/Engineer	Neutral	Neutral	Neutral	Agree	Neutral	Agree	Disagree	Neutral	Disagree	Disagree	Agree	Agree	Türkiye-Ankara
2024-11-28 10:07:12	Male	18-24	Technology/IT	Software Developer/Engineer	Strongly Disagree	Neutral	Disagree	Agree	Neutral	Disagree	Agree	Agree	Strongly Disagree	Disagree	Disagree	Disagree	Türkiye
2024-11-28 10:07:23	Female	18-24	Technology/IT	Software Developer/Engineer	Agree	Agree	Neutral	Agree	Strongly Agree	Agree	Disagree	Agree	Neutral	Agree	Strongly Agree	Neutral	Turkiye
2024-11-28 10:07:27	Female	18-24	Technology/IT	Software Developer/Engineer	Agree	Disagree	Neutral	Agree	Strongly Agree	Agree	Strongly Disagree	Agree	Neutral	Agree	Strongly Agree	Neutral	TURKEY
2024-11-28 10:07:38	Female	18-24	Technology/IT	Software Developer/Engineer	Agree	Agree	Neutral	Agree	Strongly Agree	Agree	Disagree	Agree	Neutral	Agree	Agree	Neutral	Türkiye 🇹🇷
2024-11-28 10:08:04	Male	18-24	Technology/IT	Software Developer/Engineer	Agree	Neutral	Disagree	Agree	Agree	Agree	Strongly Agree	Agree	Agree	Agree	Agree	Agree	Somalia
2024-11-28 10:28:00	Male	18-24	Finance	Software Developer/Engineer	Strongly Agree	Strongly Disagree	Agree	Agree	Neutral	Agree	Neutral	Neutral	Neutral	Agree	Agree	Strongly Agree	USA
2024-11-28 10:29:52	Male	18-24	Technology/IT	Software Developer/Engineer	Neutral	Neutral	Neutral	Neutral	Neutral	Neutral	Neutral	Neutral	Neutral	Neutral	Neutral	Neutral	Turkey
2024-12-01 13:58:55	Female	45-54	Education	Data Scientist/Analyst	Strongly Agree	Agree	Disagree	Disagree	Agree	Agree	Agree	Disagree	Disagree	Agree	Disagree	Disagree	Germany
2024-12-01 14:02:45	Female	65 or Above	Finance	Executive/Manager	Agree	Strongly Agree	Disagree	Disagree	Neutral	Disagree	Disagree	Disagree	Neutral	Agree	Disagree	Neutral	Norway
2024-12-01 14:06:22	Female	35-44	Healthcare	Executive/Manager	Agree	Disagree	Disagree	Strongly Disagree	Neutral	Disagree	Disagree	Neutral	Neutral	Agree	Disagree	Agree	Netherlanda
2024-12-02 12:19:14	Male	18-24	Technology/IT	Software Developer/Engineer	Neutral	Agree	Strongly Disagree	Strongly Disagree	Strongly Disagree	Strongly Disagree	Disagree	Strongly Disagree	Strongly Disagree	Neutral	Strongly Disagree	Strongly Disagree	Bosnia and Herzegovina
2024-12-02 12:20:37	Male	25-34	Technology/IT	Software Developer/Engineer	Agree	Disagree	Neutral	Agree	Agree	Strongly Disagree	Strongly Agree	Agree	Agree	Neutral	Strongly Agree	Agree	Sierra Leone
2024-12-02 12:46:51	Male	18-24	Technology/IT	Data Scientist/Analyst	Agree	Agree	Disagree	Disagree	Agree	Neutral	Neutral	Neutral	Agree	Agree	Strongly Disagree	Neutral	Pakistan
2024-12-02 13:12:03	Male	18-24	Technology/IT	Software Developer/Engineer	Strongly Agree	Neutral	Strongly Disagree	Disagree	Strongly Disagree	Disagree	Agree	Strongly Disagree	Strongly Agree	Strongly Agree	Neutral	Strongly Disagree	Türkiye
2024-12-02 13:13:44	Female	18-24	Technology/IT	Software Developer/Engineer	Neutral	Neutral	Strongly Agree	Neutral	Neutral	Agree	Neutral	Agree	Disagree	Disagree	Agree	Neutral	Nigeria.
2024-12-02 13:14:06	Female	18-24	Technology/IT	Software Developer/Engineer	Agree	Agree	Neutral	Disagree	Disagree	Agree	Agree	Neutral	Disagree	Disagree	Disagree	Agree	Egypt
2024-12-02 13:14:53	Male	18-24	Technology/IT	Software Developer/Engineer	Agree	Neutral	Agree	Agree	Neutral	Agree	Strongly Agree	Agree	Neutral	Neutral	Agree	Agree	Somalia
2024-12-02 13:15:15	Male	18-24	Technology/IT	Software Developer/Engineer	Agree	Agree	Neutral	Disagree	Neutral	Neutral	Agree	Agree	Agree	Agree	Agree	Agree	Somaliland
2024-12-02 13:15:20	Male	18-24	Technology/IT	Software Developer/Engineer	Strongly Agree	Neutral	Strongly Disagree	Neutral	Neutral	Neutral	Neutral	Neutral	Agree	Neutral	Disagree	Neutral	Somaliland
2024-12-02 13:18:02	Male	18-24	Education	Software Developer/Engineer	Agree	Neutral	Neutral	Neutral	Agree	Agree	Neutral	Neutral	Agree	Agree	Disagree	Agree	turkey
2024-12-02 13:20:10	Male	18-24	Technology/IT	Software Developer/Engineer	Agree	Neutral	Agree	Neutral	Neutral	Neutral	Disagree	Neutral	Disagree	Neutral	Disagree	Neutral	Algeria
2024-12-02 13:20:58	Male	18-24	Technology/IT	Software Developer/Engineer	Agree	Agree	Neutral	Agree	Agree	Agree	Disagree	Neutral	Disagree	Neutral	Agree	Disagree	Yemen
2024-12-02 13:57:17	Male	18-24	Technology/IT	Data Scientist/Analyst, Software Developer/Engineer	Neutral	Agree	Neutral	Neutral	Neutral	Neutral	Neutral	Neutral	Neutral	Neutral	Neutral	Neutral	Kenya
2024-12-02 20:09:33	Male	18-24	Technology/IT	Software Developer/Engineer	Strongly Agree	Neutral	Disagree	Agree	Strongly Agree	Neutral	Disagree	Agree	Strongly Agree	Neutral	Strongly Agree	Agree	Azerbaijan
2024-12-09 12:55:44	Male	55-64	Education	Researcher/Academician	Agree	Disagree	Strongly Disagree	Neutral	Disagree	Neutral	Disagree	Neutral	Agree	Agree	Disagree	Agree	Italy
2024-12-09 15:21:54	Female	35-44	Education	Researcher/Academician	Agree	Disagree	Neutral	Neutral	Disagree	Agree	Disagree	Strongly Disagree	Strongly Agree	Agree	Strongly Disagree	Agree	Italy
2024-12-11 13:43:54	Male	55-64	Education	Researcher/Academician	Strongly Agree	Strongly Disagree	Neutral	Neutral	Neutral	Neutral	Neutral	Neutral	Neutral	Agree	Strongly Disagree	Neutral	Italy
2024-12-19 13:59:34	Male	55-64	Education	Executive/Manager	Neutral	Disagree	Disagree	Disagree	Disagree	Disagree	Disagree	Disagree	Disagree	Disagree	Strongly Disagree	Strongly Disagree	Italy
2024-12-19 15:17:13	Male	55-64	Education	Researcher/Academician	Agree	Disagree	Disagree	Neutral	Disagree	Agree	Disagree	Disagree	Agree	Disagree	Strongly Disagree	Disagree	Italy
